# Supplementary material
Source: PubMed Central journal article supplement (PMC6555552)

## Supplemental Figure Legends

**Figure S1 (Related to Figure 1): Different phases of colonic wound healing.** (A) Day 1 post-injury (Bar=20  $\mu$ m) is characterized by loss of crypts and a nascent wound bed. Day 4 post-injury (upper panel, Bar=50  $\mu$ m) is characterized by squamous wound associated epithelial cells (WAE cells) that cover the denuded surface of the wound. Black arrows indicate WAE cells in the inset (Bar=10  $\mu$ m). By day 8 post-injury (upper panel, Bar=50 $\mu$ m), WAE cells are replaced by columnar shaped epithelial cells (indicated by red arrows in the inset) and the crypts adjacent to the wound bed formed open extensions (wound channels) that emanate towards the wound bed. The black dashed line indicates a wound channel and black arrows highlight multiple areas of nascent crypts budding from the wound channel (Bar=20  $\mu$ m). By day 12 post-injury, new crypts have formed and filled in the defect created by the biopsy wound. The black dashed line represents the original wounded area (as determined by the persistent hypertrophy of the muscularis mucosa, Bar=50  $\mu$ m). See (Manieri et al., 2012; Miyoshi et al., 2012). (B) FITC detected in the serum of mice from the indicated groups post-injury (n=7-10 mice/group). Sham=serum FITC in mice that underwent endoscopy but not biopsy injury. Significance was determined by one-way ANOVA and TUKEY's post hoc test: \*\*p<0.01. All values are displayed as mean  $\pm$  SEM.

**Figure S2 (Related to Figure 1): Sustained PGE2 levels impair the transition to wound channel formation and crypt regeneration.** (A) Representative images of crypts adjacent to the wound bed 6 days after biopsy injury from vehicle or SW033291-treated mice stained for cleaved caspase-3 (red, apoptotic cells),  $\beta$ -catenin (green, epithelial cells), and bis-benzimide (blue, nuclei). White arrows indicate cells that are caspase-3-positive in the mesenchyme.

Bars=40  $\mu$ m. (B-D) WT mice were biopsy injured and treated with either vehicle or SW033291 (twice daily from day 4-day 10) and colon tissue distant to the site of injury was evaluated. (B) Representative images of H&E stained sections (Bars=100  $\mu$ m) at day 12 post-injury from vehicle or SW033291 treated groups. (C) Representative images of crypts distant to the wound bed 12 days after biopsy injury from the indicated groups stained for Ki-67 (red, proliferating cells),  $\beta$ -catenin (green, epithelial cells), and bis-benzimide (blue, nuclei). Bars=40  $\mu$ m. (D) Quantification of Ki-67 positive epithelial cells from mice in (C) (n=11-12 wounds/group from 4-5 mice/group). (E-F) WT mice were biopsy injured and treated with either vehicle, dmPGE2, or the PGI2 analog Iloprost (twice daily from day 4-day 10). (E) Quantification of Ki-67-positive epithelial cells at day 6 post-injury (n=13-16 wounds/group from 5-6 mice/group). Significance was determined by one-way ANOVA and TUKEY's post hoc test: \*\*p<0.01 (F) Representative images of H&E stained wound sections at day 12 post-injury from the indicated groups. Bars=100  $\mu$ m. The black line at the center of the wounds indicates wound bed length. All values in D and E are displayed as mean  $\pm$  SEM.

**Figure S3 (Related to Figure 2): TLR2 is required for PGE2 induction during the barrier re-establishment phase of wound repair.** (A-C) WT cMSCs were cultured, treated with the indicated TLR agonists at four different concentrations (1, 10, 100 and 1000 ng/ml). Levels of PGE2 in the 24-hour culture supernatants from cMSCs treated with (A) Pam3CSK4, (B) Pam2CSK4 or (C) LPS. Significance was determined by one-way ANOVA and TUKEY's post hoc test: \*\*p<0.01, \*\*\*p<0.001, \*\*\*\*p<0.0001. (D) cMSCs from WT and *TLR2*<sup>-/-</sup> mice were cultured and treated with Pam3CSK4 (Pam3) or vehicle. PGE2 was measured in the 24-hour culture supernatants (n=3 experiments). Significance was determined by one-way ANOVA and TUKEY's post hoc test: \*\*\*\*p<0.0001, ns=not significant. (E-G) WT and *TLR2*<sup>-/-</sup> mice were

biopsy injured and healing was evaluated. (E) Wound tissue was collected at day 4 post-injury for measurement of PGE2 levels by ELISA of the homogenates (n=16-19 wounds/group from 5-6 mice/group). Significance was determined by unpaired Student's t test: \*\*p<0.01. (F) Representative images of wound sections from WT and *TLR2*<sup>-/-</sup> mice at day 4 post injury stained for claudin-4 (red, WAE cells) and bis-benzimide (blue, nuclei). Bars=100µm. White arrows denote WAE cells, asterisk represents wound bed and the adjacent crypts are indicated by white dashed lines. (G) Quantification of wound repair (based on imaging of whole mounts) of the indicated groups (n= 8-18 wounds per group from 3-7 mice per group). Significance was determined by unpaired Student's t test: \*\*\*p<0.001. (H) After collecting the 24-hour culture supernatants from the secondary screen 96 well plate, cells were washed with PBS and incubated with MTT reagent to assess cell survival (n=3 experiments). DCA treatment did not alter cell viability at any of the doses tested as compared to m-toluic acid (100µM) and spermidine (100µM). (I) cMSCs were stimulated with the indicated agonists for 24 hours and subsequently washed in PBS and lysed. The lysates were analyzed for PGE2 levels by ELISA (n=3 independent experiments). Significance was determined by one-way ANOVA and TUKEY's post hoc test: \*\*p<0.01. All values in A-F and G-I are displayed as mean ± SEM.

**Figure S4 (Related to Figure 3): Vancomycin mediated reduction of DCA levels and inhibition of crypt regeneration is reversed by blocking PGE2 synthesis.** (A) WT colonic mucosal tissue distant to the wound site was collected on day 4 post-injury and analyzed for DCA levels by mass spectrometry (n=9-11 wounds/ group from 3 mice per group). Sham=colonic tissue from mice that underwent endoscopy but not biopsy injury. (B-C) Mice were treated with either vancomycin or vehicle starting 2 weeks prior to biopsy injury and the treatment continued until the day of sacrifice as shown in Figure 3B. (B) Fecal DCA

concentrations determined by mass spectrometry at day 6 post-injury from vehicle and vancomycin treated mice (n=16-33 wounds/group from 6-10 mice/group). Significance was determined by Mann Whitney test: \*\*\*\*p<0.0001. (C) Quantification of Ki-67 positive epithelial cells at day 6 post-injury in vehicle and vancomycin-treated mice (n=14-15 wounds/group from 5 mice/group). Significance was determined by unpaired Student's t test: \*\*\*\*p<0.0001. (D) Vancomycin treated mice were injured, treated with either vehicle or NS-398 and wound PGE2 levels were measured by ELISA at day 6 post-injury (n=13- 17 wounds/group from 5-6 mice/group). Significance was determined by unpaired Student's t test: \*\*\*p<0.001. All values are displayed as mean  $\pm$  SEM.

**Figure S5 (Related to Figure 4): DCA reconstitution reversed vancomycin phenotype.** (A-B) Vancomycin-treated mice were injured and then intrarectally administered DCA (100  $\mu$ M, twice daily from day 4-day 10) or equivalent volumes of vehicle as shown in Figure 4A. (A) Plot of Ki-67 positive epithelial cells per wound at day 6 post-injury (n=10-11 wounds/group from 4-5 mice/group). Significance was determined by unpaired Student's t test: \*p<0.05. (B) Representative images of wound sections at day 6 post-injury that were stained for cleaved caspase-3 (red, apoptotic cells),  $\beta$ -catenin (green, epithelial cells), and bis-benzimide (blue, nuclei). Dashed white line indicates wound adjacent crypts and asterisks indicate wound beds. The upper panel was a wounded area and the lower panel was an area  $\sim$ 10 crypts away from the wounded region. The White arrow indicates a capase-3 positive cell. Bars=40  $\mu$ M. (C-E) Vancomycin-treated mice were biopsy injured and administered either DCA (100  $\mu$ M, twice daily from day 0-day 3) or an equivalent volume of vehicle. Mice were sacrificed on day 4 post-injury and wounds were collected for whole mount analysis and PGE2 production. (C) Representative whole mount images of wounds from indicated groups of mice. Bars= 200 $\mu$ m.

The original wounded area is outlined with white dashed lines and the asterisk indicates a fibrin cap. (D) Quantification of wound healing at day 4 post-injury in the indicated groups (n= 10-11 wounds per group from 4 mice per group). Significance was determined by unpaired Student's t test: \*\*\*\*p<0.0001. (E) Wound PGE2 levels measured in indicated groups of mice (n=11-13 wounds/group from 5 mice/group). Significance was determined by unpaired Student's t test: \*p<0.05. (F-G) Vancomycin pre-treated mice were biopsy injured and gavaged twice with PBS, *C. scindens* or *C. clostridioforme* as shown in Figure 4E. (F) Stool from the gavaged groups was collected at day 6 post-injury and genomic DNA was isolated. Colonization was confirmed by PCR based detection of specific bacterial genes. baiCD corresponds to the bile acid inducible gene found in *C. scindens* and rpoB is RNA polymerase beta-subunit gene (see methods for primer details). Each number corresponded to a single mouse. (G) Wound DCA levels at day 6 post-injury in groups of mice described in Figure 5F (n=24-34 wounds/group (from 9-10 mice/group)). ND is not detected. Values in A, C, D and G are displayed as mean ± SEM.

**Figure S6 (Related to Figure 6): DCA acts via FXR to inhibit cPLA2 expression and PGE2 generation to promote crypt regeneration.** (A-D) WT cMSCs were cultured and stimulated with Pam3CSK4 (100ng/ml) in the presence or absence of DCA, INT-777 (TGR5 agonist) or INT-747 (FXR agonist) at the indicated concentrations for 24 hours. Immunoblots of cMSC lysates stained for (A, D) cPLA2, (B) PTGS1, PTGS2, (C) cPGES and mPGES-2. β-Actin was used as the loading control (E) Relative band intensity expressed as fold change over control (n=3 independent experiments). Significance was determined by unpaired Student's t test: \*p<0.05. (F-G) Vancomycin pre-treated mice were biopsy injured and intra-rectally administered either CDCA or vehicle (twice daily from day 4-day10 post-injury). (F) Representative images of H&E stained wound sections (Bars=100μm) and (G) wound bed length from indicated groups at

day 12 post-injury (n=9-14 wounds/group from 4-5 mice/group). Significance was determined by unpaired Student's t test: \*p<0.05. (H-I) *FXR*<sup>-/-</sup> mice were injured, treated with either vehicle or NS-398 (twice daily from days 4-10). (H) Representative images of day 12 H&E stained wound sections from *FXR*<sup>-/-</sup> mice treated with vehicle or NS-398 (PTGS2 inhibitor). (I) Wound bed length from groups of indicated groups of mice (n=16-19 wounds/group from 6 mice/group). Significance was determined by unpaired Student's t test: \*\*\*p<0.001. All values in F and H are displayed as mean ± SEM.

**Supplemental Table S1 (Related to Figure 2):** Screen of microbial metabolites for their effect on Pam3CSK4 induced PGE2 production from cMSCs.

| Metabolite number | fold change over Pam3CSK4 | Metabolite name                               |
|-------------------|---------------------------|-----------------------------------------------|
| 1                 | 1.198315936               | 3-Phenylpropionic acid                        |
| 2                 | 0.975084945               | valeric acid                                  |
| 3                 | 0.600206453               | 2'-Deoxycytidine 5'-monophosphate sodium salt |
| 4                 | 1.726265124               | p- toluic acid                                |
| 5                 | 0.80257489                | 4-Hydroxyphenylacetic acid                    |
| 6                 | 1.04934347                | DL-3-Aminoisobutyric acid                     |
| 7                 | 0.933264454               | N-Methyl-DL-alanine                           |
| 8                 | 0.706877779               | N $\alpha$ -Acetyl-L-ornithine                |
| 9                 | 0.59740957                | meso-2,6-Diaminopimelic acid                  |
| 10                | 0.771303479               | Pyridoxamine dihydrochloride                  |
| 11                | 0.795847972               | 2'-Deoxyadenosine 5'-monophosphate            |
| 12                | 1.501137234               | 4-Hydroxyindole                               |
| 13                | 0.853469256               | Oxypurinol                                    |
| 14                | 1.175569311               | Indole-3-acetamide                            |
| 15                | 0.541307317               | N-Acetyl-L-aspartic acid                      |
| 16                | 1.324644414               | N-Acetyl-L-glutamic acid                      |
| 17                | 1.02612715                | N-Acetylneuraminic acid                       |
| 18                | 0.956171552               | 3-Methyl-2-oxobutanoic acid sodium salt       |
| 19                | 1.229726745               | DL-Malic acid                                 |
| 20                | 0.958801012               | D-Ribulose 5-phosphate sodium salt            |
| 21                | 0.910403108               | D-Pantothenic acid hemicalcium salt           |

|    |             |                                                     |
|----|-------------|-----------------------------------------------------|
| 22 | 0.267239045 | 4-pyridoxic acid                                    |
| 23 | 0.672542946 | L-Glyceric acid sodium salt                         |
| 24 | 1.053824086 | $\alpha$ -Ketoglutaric acid                         |
| 25 | 0.593489333 | Xanthine                                            |
| 26 | 0.942777355 | Cytidine 5'-monophosphate disodium salt             |
| 27 | 0.80802551  | 4-Methyl-2-oxopentanoic acid sodium salt            |
| 28 | 0.885410638 | 3-Methyl-2-oxovaleric acid sodium salt              |
| 29 | 1.050120593 | 3-(4-Hydroxyphenyl)propionic acid                   |
| 30 | 1.018299472 | $\gamma$ -Aminobutyric acid                         |
| 31 | 1.208131953 | L-2-Aminobutyric acid                               |
| 32 | 1.535307679 | 5-Aminovaleric acid                                 |
| 33 | 0.519237753 | L-Homoserine                                        |
| 34 | 0.798042008 | L-Pipecolic acid                                    |
| 35 | 0.440479753 | formate                                             |
| 36 | 1.349281173 | L-Citrulline                                        |
| 37 | 0.589720037 | N-Methyl-L-proline                                  |
| 38 | 1.20928467  | D-Pantothenic acid hemicalcium salt                 |
| 39 | 0.880159959 | L-Tyrosine methyl ester                             |
| 40 | 0.667958345 | Piperidine                                          |
| 41 | 0.905115066 | Taurine                                             |
| 42 | 0.45755904  | urea                                                |
| 43 | 0.955963574 | Tyramine                                            |
| 44 | 1.036369097 | Urocanic acid                                       |
| 45 | 0.838616963 | (3-Carboxypropyl)trimethylammonium chloride         |
| 46 | 0.674016905 | N-Acetyl-D-glucosamine                              |
| 47 | 0.73018728  | Nicotinic acid                                      |
| 48 | 1.11082197  | Pyridoxal hydrochloride                             |
| 49 | 1.161475763 | Pyridoxine                                          |
| 50 | 1.213872233 | Sarcosine                                           |
| 51 | 1.402429228 | N,N-Dimethylglycine                                 |
| 52 | 1.189336919 | Cytosine                                            |
| 53 | 0.990152094 | Uracil                                              |
| 54 | 0.600444583 | Adenine                                             |
| 55 | 0.645858733 | Hypoxanthine                                        |
| 56 | 0.67883394  | Guanine                                             |
| 57 | 0.821188825 | Cytidine                                            |
| 58 | 0.89762589  | Cytidine 2':3'-cyclic monophosphate monosodium salt |
| 59 | 1.171135969 | D-Ala-D-Ala                                         |
| 60 | 0.842890857 | 1,3-Diaminopropane                                  |
| 61 | 0.953958811 | Amino-2-propanol                                    |
| 62 | 0.424357137 | deoxycholic acid                                    |

|    |             |                               |
|----|-------------|-------------------------------|
| 63 | 0.538790402 | L-Methionine                  |
| 64 | 0.798151084 | Putrescine                    |
| 65 | 0.693165161 | Cadaverine                    |
| 66 | 0.805983933 | Glutaric acid                 |
| 67 | 0.364868343 | deoxycholate                  |
| 68 | 0.878665279 | 5-Hydroxyindole-3-acetic acid |
| 69 | 0.878114711 | dTMP                          |
| 70 | 1.010822938 | Saccharopine                  |
| 71 | 0.859951031 | Ornithine                     |
| 72 | 0.984427794 | Beta-alanine                  |
| 73 | 0.958495672 | dmPGE2                        |
| 74 | 0.786514848 | butyric acid                  |
| 75 | 0.114641017 | spermidine                    |
| 76 | 0.883956378 | fumaric acid                  |
| 77 | 0.869800064 | succinic acid                 |
| 78 | 0.727013506 | propionate                    |
| 79 | 0.8061      | Lactic acid                   |
| 80 | 0.488744103 | m-toluic acid                 |
| 81 | 0.85621392  | Isobutyric acid               |
| 82 | 1.164780118 | butyrate                      |
| 83 | 0.682375917 | lithocholic acid              |
| 84 | 0.703422303 | acetate                       |



Figure S1

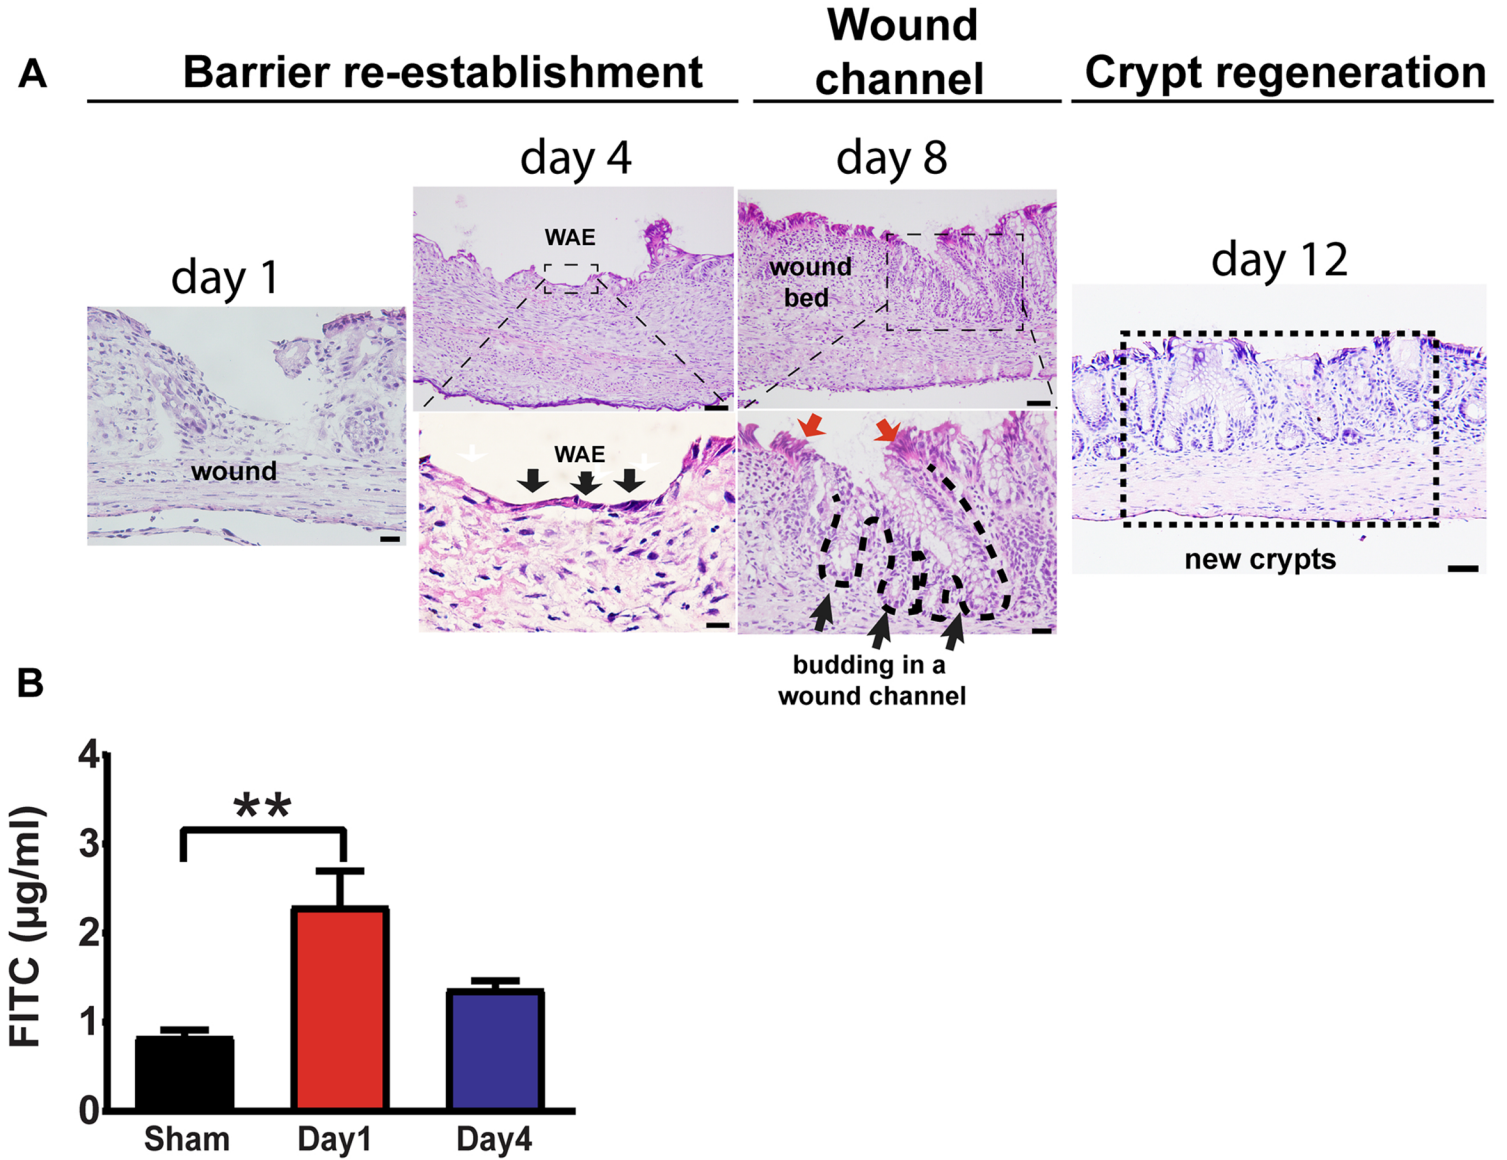

# Figure S2

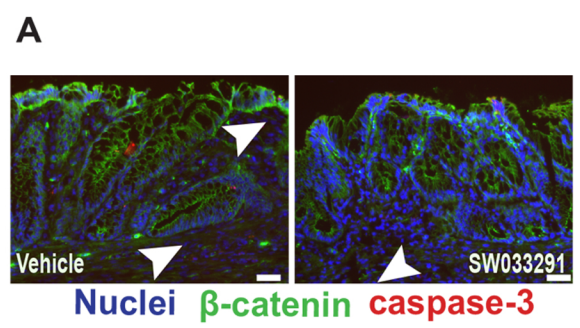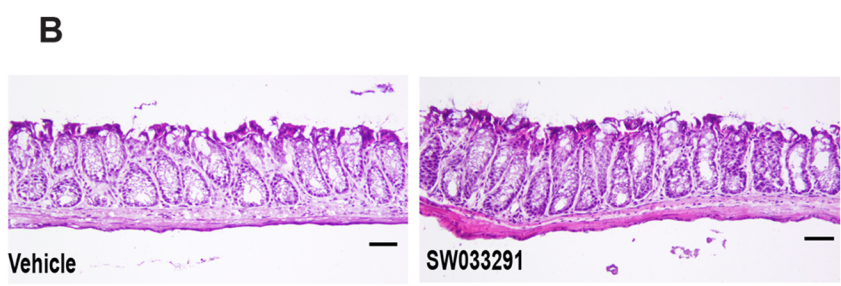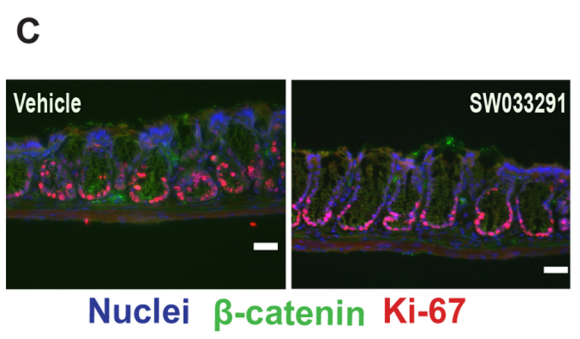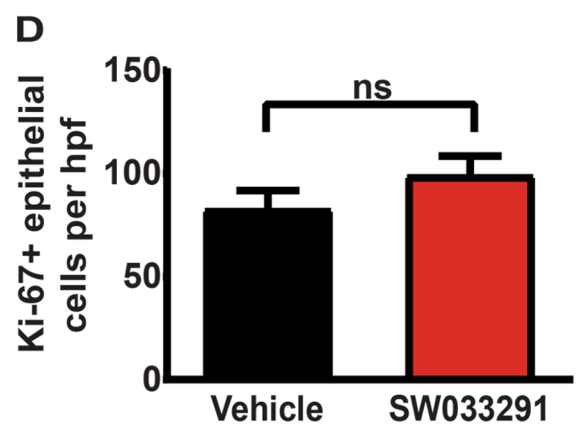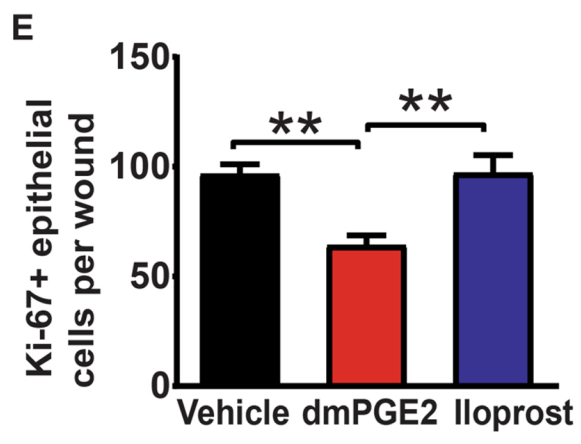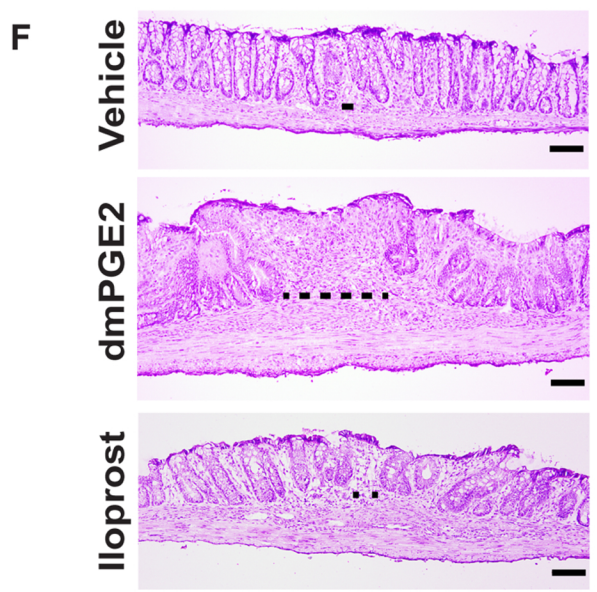

**Figure S3**

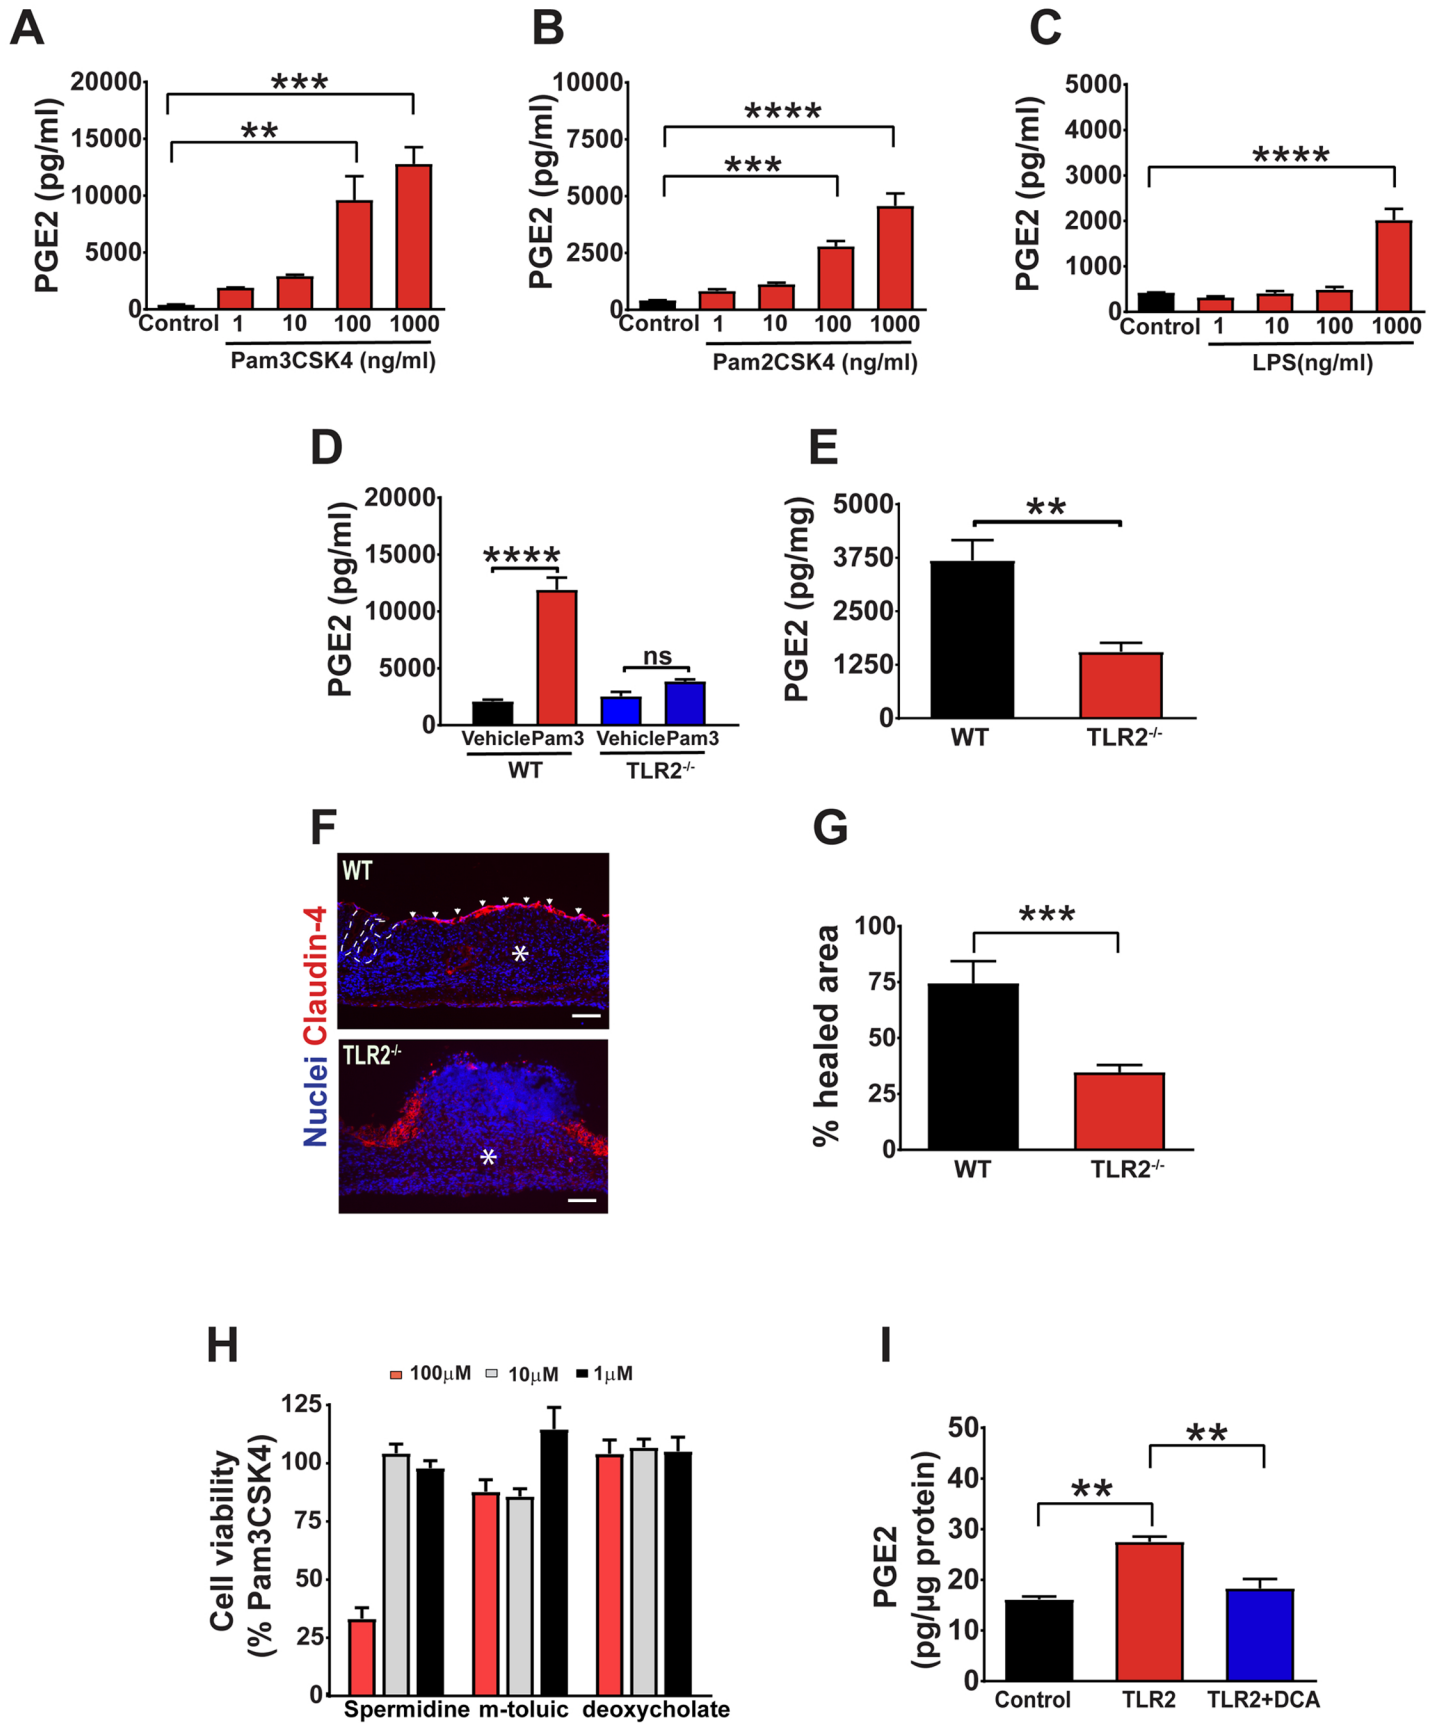

Figure S4

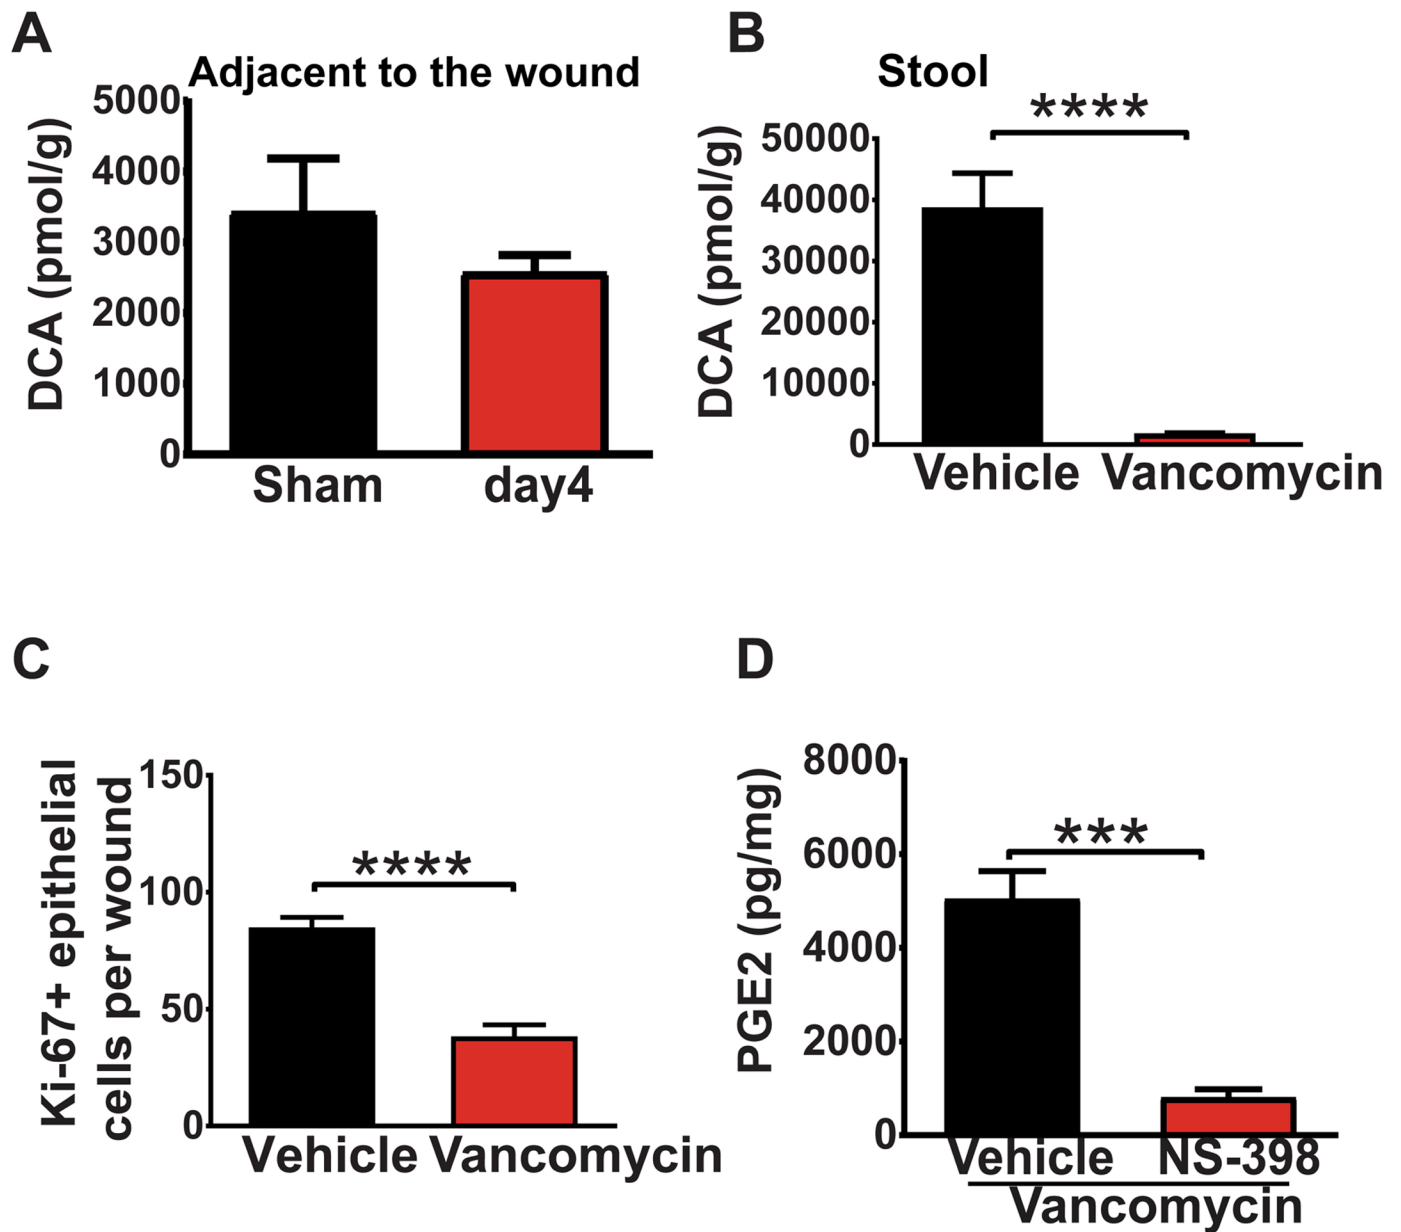

**Figure S5**

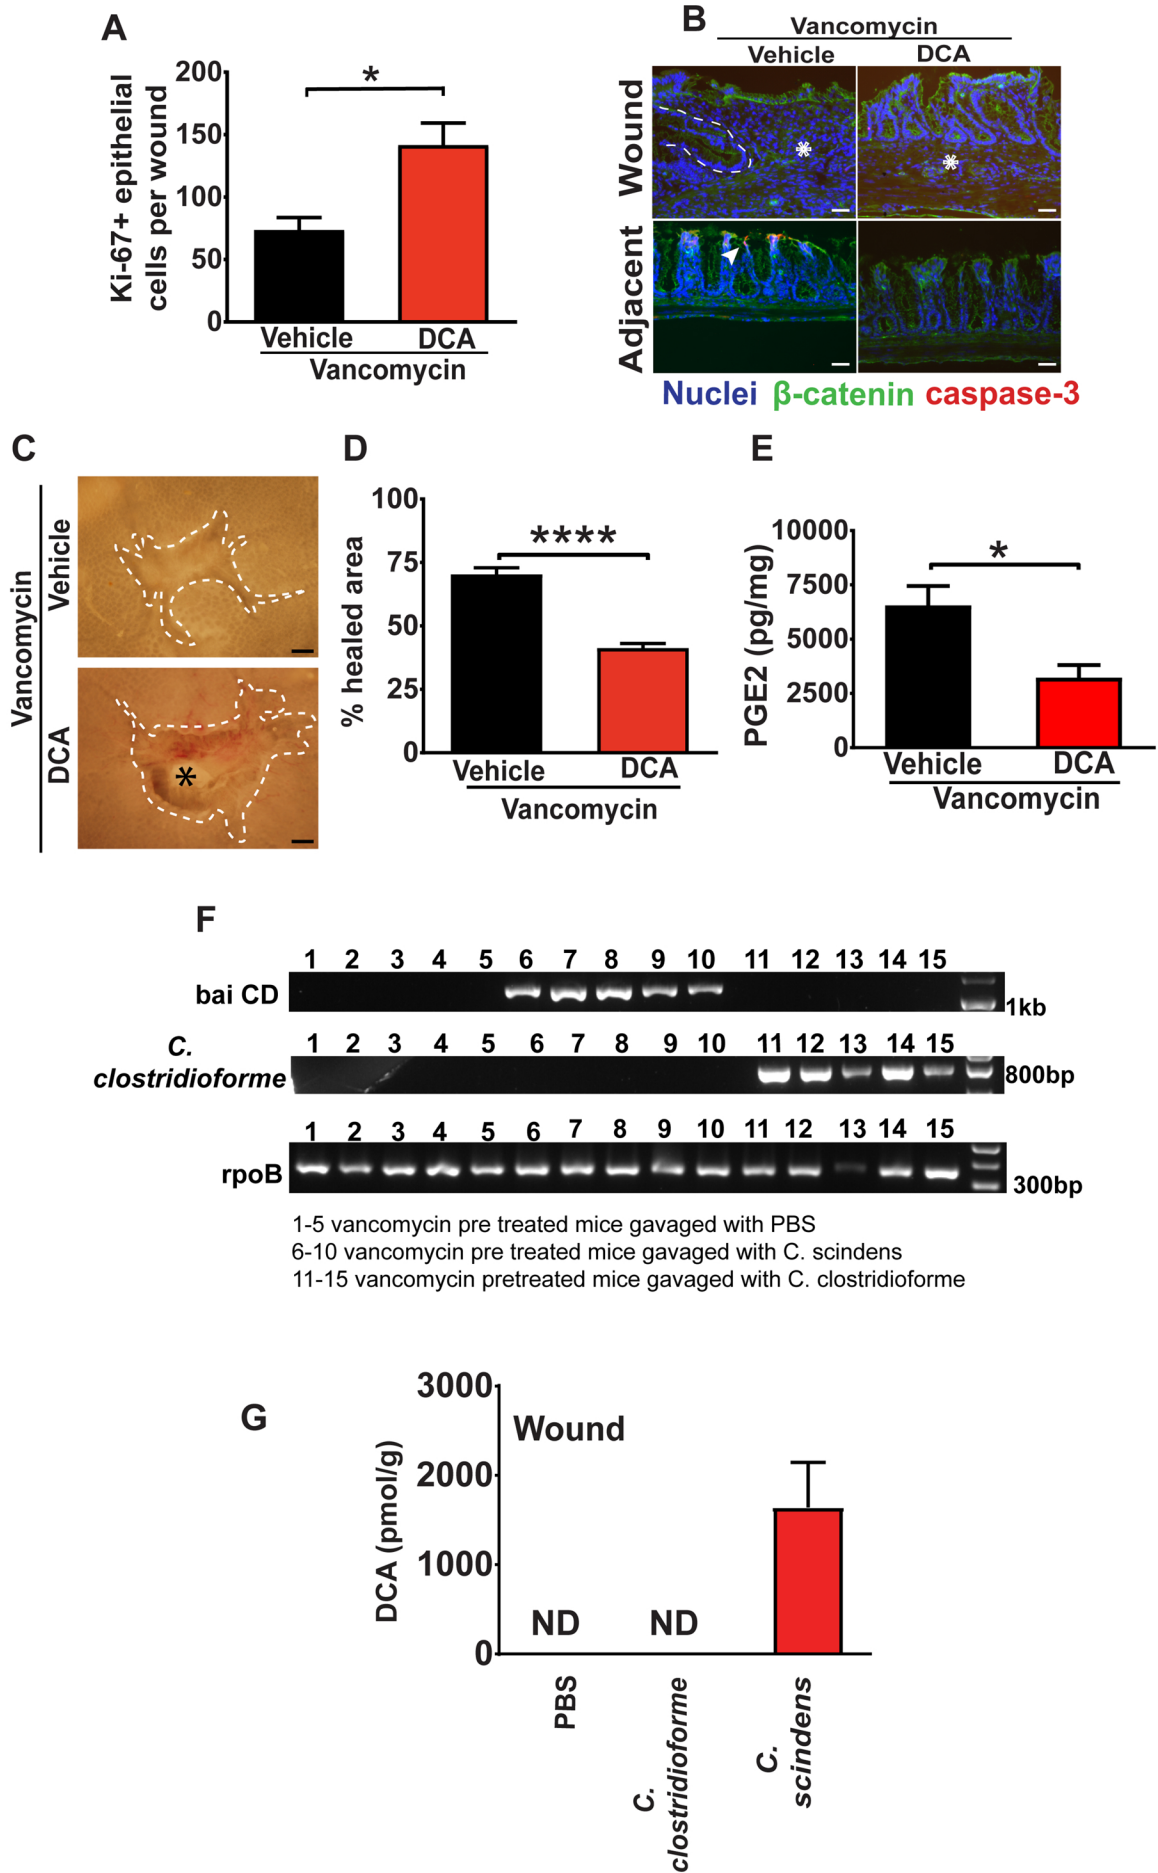

**Figure S6**

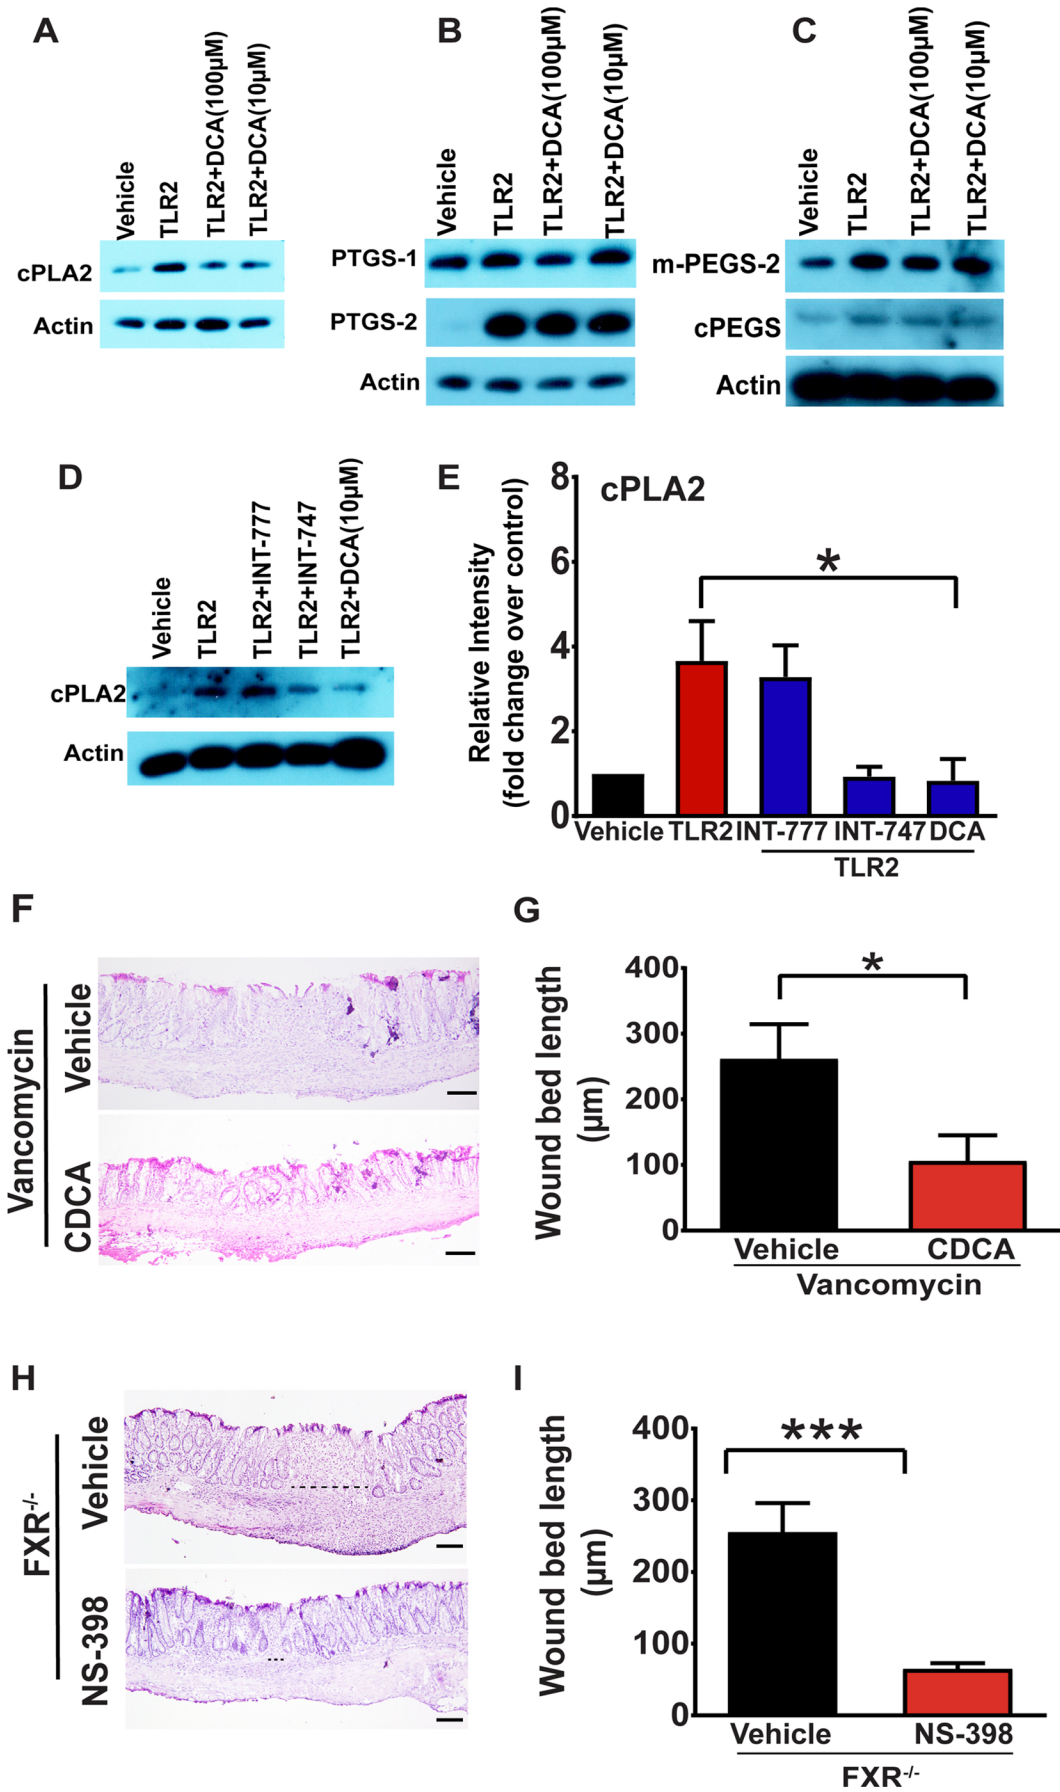

Supplement: NIHMS1503063-supplement-2.pdf [file NIHMS1503063-supplement-2.pdf]
